# Supplementary material for: How and why do Quality Circles work for General Practitioners - a realist approach
Source: bioRxiv or medRxiv preprint supplement (doi:10.1101/2021.11.07.21265092), 2021-11-10
Supplement: Supplementary file [file media-1.pdf]

## Supplemental material 1

### Experts and stakeholders participating in interviews and focus groups

| Experts / groups                                                                                                                                    | Type of qualitative data | Date and location     | Length of time |
|-----------------------------------------------------------------------------------------------------------------------------------------------------|--------------------------|-----------------------|----------------|
| Economist, CEO of Santémed network of primary health care centres owned by health insurance company                                                 | Interview                | 01/05/2013<br>Zürich  | 1½ h           |
| GP, tutor in MediX Bern, a doctor-owned network of primary health care centres                                                                      | Interview                | 02/05/2013<br>Bern    | 1½ h           |
| Two social scientists, representatives of the professional body, Swiss Medical Association                                                          | Interview                | 02/05/2013<br>Bern    | 1½ h           |
| 8 Participants, GPs, and a QC facilitator belonging to MediS Zürich, a doctor-owned network of primary health care centres                          | Focus group              | 14/05/2013<br>Zürich  | 1¼ h           |
| GP and manager, facilitator and member of Sanacare's management board, a network of primary health care centres owned by health insurance companies | Interview                | 15/05/2013<br>Bern    | 1¼ h           |
| 12 Representatives of the quality committee of the Swiss Society of General Internal Medicine, GPs                                                  | Focus group              | 13/06/2013<br>Bern    | 1h             |
| 24 delegates of the European Society of Quality and Safety in Family Medicine, all GPs                                                              | Focus group              | 16/11/2013<br>Bologna | 1h             |
