# Supplementary material for: How and why do Quality Circles work for General Practitioners - a realist approach
Source: bioRxiv or medRxiv preprint supplement (doi:10.1101/2021.11.07.21265092), 2021-11-10
Supplement: Supplementary file [file media-3.pdf]

### Supplemental material 3

#### CMO configurations across studies and demi-regularities

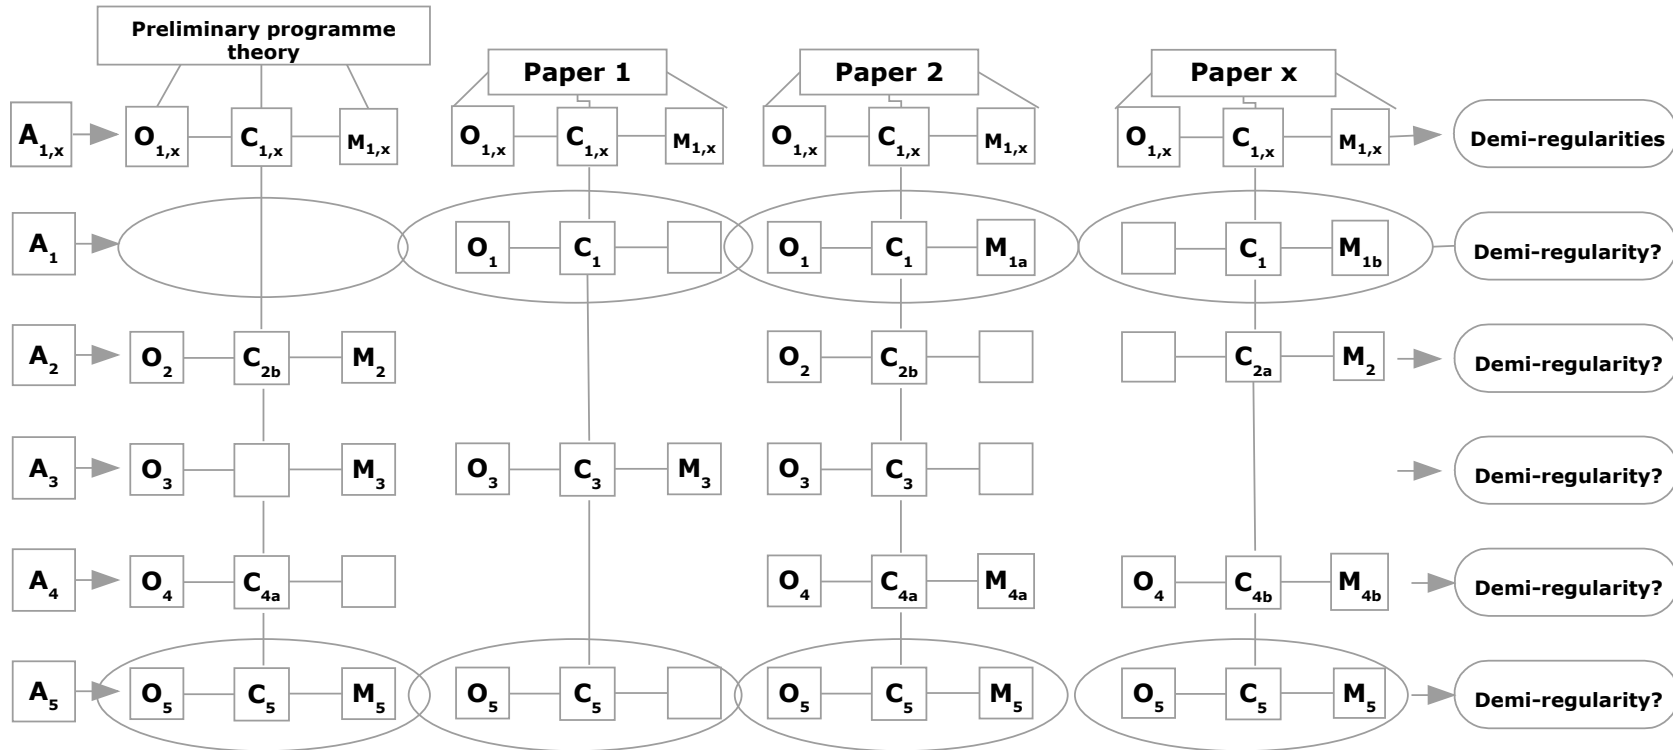

#### Legend

A: Activity. Activities 1 to 5.

O: Outcome. Outcomes 1 to 5.

C: Context. Contexts 1 to 5, although some may be missing.

M: Mechanism. Mechanisms at different levels of activity; the same outcome may have several mechanisms; if no mechanism was mentioned, the square is blank.

Comparing groups of CMOs across studies may create a demi-regularity.

The marked demi-regularities are examples of how I built CMO configurations across the papers.
