# Supplementary material for: How and why do Quality Circles work for General Practitioners - a realist approach
Source: bioRxiv or medRxiv preprint supplement (doi:10.1101/2021.11.07.21265092), 2021-11-10
Supplement: Supplementary file [file media-4.pdf]

**Supplemental material 4 Participants in interviews and focus groups, refining the literature-based programme theory**

| <b>Participants: number of people</b>                                                                                                                              | <b>Type of qualitative data</b> | <b>Date and location</b> | <b>Length of time</b> |
|--------------------------------------------------------------------------------------------------------------------------------------------------------------------|---------------------------------|--------------------------|-----------------------|
| GP and manager, CEO of Santémed network of primary health care centres owned by health insurance company                                                           | Interview                       | 18/03/2015<br>Wil        | 23'26''               |
| GP, tutor in MediX Bern, a doctor-owned network of primary health care centres in Bern                                                                             | Interview                       | 19/03/2015<br>Bern       | 64'21''               |
| GP and manager, facilitator and member of Sanacare's management board, a network of primary health care centres owned by health insurance companies                | Interview                       | 25/03/2015<br>Bern       | 42'40''               |
| Two social scientists, representatives of the professional body Swiss Association of Medicine                                                                      | Interview                       | 02/04/2015<br>Bern       | 72'47''               |
| GP, facilitator of a QC belonging to MediS Zürich, a doctor-owned network of primary health care centres, Professor at the Institute of General Practice in Zürich | Interview                       | 02/04/2015<br>Zurich     | 61'26''               |
| Group of 21 GPs at the open meeting in Fischingen on QCs organized by EQuIP                                                                                        | Focus group                     | 24/04/2015<br>Fischingen | 90'                   |
| Group of 12 GPs at the open meeting in Fischingen on QCs organized by EQuIP                                                                                        | Focus group                     | 25/04/2015<br>Fischingen | 90'                   |
| GP, executive for General Practice at the hospital in Aarau                                                                                                        | Interview                       | 08/05/2015<br>Aarau      | 37'17''               |
