# Supplementary material for: How and why do Quality Circles work for General Practitioners - a realist approach
Source: bioRxiv or medRxiv preprint supplement (doi:10.1101/2021.11.07.21265092), 2021-11-10
Supplement: Supplementary file [file media-15.pdf]

## Consent Form for

### ***Exploring why Quality Circles work in Primary Health Care: A realist approach about how, why and under what circumstances they work - 18/12/2014***

---

***We appreciate your interest in participating in this research! Quickly read through these terms before agreeing to participate.***

***Please tick the appropriate boxes***

**Yes    No**

#### **Taking Part**

I have read and understood the research information sheet dated 17/12/2014.  Yes  No

I have been given the opportunity to ask questions about the project.  Yes  No

I agree to take part in the project. Taking part in the project will include being interviewed and recorded audio.  Yes  No

I understand that my taking part is voluntary; I can withdraw from the study at any time and I do not have to give any reasons for why I no longer want to take part.  Yes  No

#### **Use of the information I provide for this project only**

I understand my personal details such as phone number and address will not be revealed to people outside the project.  Yes  No

I understand that my words may be quoted in publications, reports, web pages, and other research outputs.  Yes  No

*Please choose **one** of the following two options:*

I would like my real name used in the above

I would **not** like my real name to be used in the above.

#### **Use of the information I provide beyond this project**

I agree for the data I provide to be archived at the UK Data Archive.<sup>1</sup>  Yes  No

I understand that other genuine researchers will have access to this data only if they agree to preserve the confidentiality of the information as requested in this form.  Yes  No

I understand that other genuine researchers may use my words in publications, reports, web pages, and other research outputs, only if they agree to preserve the confidentiality of the information as requested in this form.  Yes  No

#### **So we can use the information you provide legally**

I agree to assign the copyright I hold in any materials related to this project to Adrian Rohrbasser.  Yes  No

## Consent Form for

### ***Exploring why Quality Circles work in Primary Health Care: A realist approach about how, why and under what circumstances they work - 18/12/2014***

---

#### 1<sup>st</sup> Interview

\_\_\_\_\_  
Name of participant      [printed]      Signature      \_\_\_\_\_      Date

\_\_\_\_\_  
Researcher      [printed]      Signature      \_\_\_\_\_      Date

#### 2<sup>nd</sup> interview

\_\_\_\_\_  
Name of participant      [printed]      Signature      \_\_\_\_\_      Date

\_\_\_\_\_  
Researcher      [printed]      Signature      \_\_\_\_\_      Date

Project contact details for further information:

Adrian Rohrbasser

Family Physician

MSc in Evidence Based Health Care

DPhil student at the Department of Primary Care Health Sciences in Oxford

New Radcliffe House, 2nd floor, Walton Street, Jericho, OX2 6NW, Tel: 01865 289300 (N.B. New Radcliffe House

postal address: Radcliffe Observatory Quarter, Woodstock Road, OX2 6GG).

[adrian.rohrbasser@kellogg.ox.ac.uk](mailto:adrian.rohrbasser@kellogg.ox.ac.uk)

Work: Santémed Gesundheitszentrum Wil, Friedtalweg 18, 9500 Switzerland, 0041719135400,

e-mail: [adrian.rohrbasser@santemed.ch](mailto:adrian.rohrbasser@santemed.ch)

#### Notes:

1. At the end of this project the audio and digital data collected from interviews with participants will be deposited at the UK Data Service for use by future researchers

This work is licenced under the Creative Commons Attribution-Non-Commercial-Share Alike 2.0 UK: England & Wales License. To view a copy of this licence, visit <http://creativecommons.org/licenses/by-nc-sa/2.0/uk/>
